# Supplementary material for: Evaluation of regional isoprene emission factors and modeled fluxes in California
Source: Copernicus journal article supplement (doi:10.5194/acp-16-9611-2016), 2016-08-02
Supplement: Supplementary file 1 [file acp-16-9611-2016-supplement.pdf]

Supplement of Atmos. Chem. Phys., 16, 9611–9628, 2016  
<http://www.atmos-chem-phys.net/16/9611/2016/>  
doi:10.5194/acp-16-9611-2016-supplement  
© Author(s) 2016. CC Attribution 3.0 License.

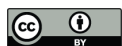

Atmospheric  
Chemistry  
and Physics  
Open Access  
EGU

*Supplement of*

## **Evaluation of regional isoprene emission factors and modeled fluxes in California**

**Pawel K. Misztal et al.**

*Correspondence to:* Pawel K. Misztal (pkm@berkeley.edu)

The copyright of individual parts of the supplement might differ from the CC-BY 3.0 licence.

# S1. Ecoregion codes (Legend to Figure 1)

## Legend

- Isop flux available
- Isop flux unavailable

ca\_eco\_I4

CA\_Ecoregion\_lev4

L4\_KEY

|                                                         |                                                      |                                          |                                                              |
|---------------------------------------------------------|------------------------------------------------------|------------------------------------------|--------------------------------------------------------------|
| 13aa Sierra Nevada-Influenced Semiarid Hills and Basins | 5d Northern Sierra Mid-Montane Forests               | 6r East Bay Hills/Western Diablo Range   | 80j Semiarid Uplands                                         |
| 13ab Sierra Valley                                      | 5e Northern Sierra Lower Montane Forests             | 6s San Francisco Peninsula               | 81a Western Sonoran Mountains                                |
| 13ac Upper Owens Valley                                 | 5f Northeastern Sierra Mixed Conifer-Pine Forests    | 6t Bay Terraces/Lower Santa Clara Valley | 81b Western Sonoran Mountain Woodland and Shrubland          |
| 13ad Mono-Adobe Valleys                                 | 5g Central Sierra Mid-Montane Forests                | 6u Livermore Hills and Valleys           | 81c Western Sonoran Basins                                   |
| 13ae Bishop Volcanic Tableland                          | 5h Central Sierra Lower Montane Forests              | 6v Upper Santa Clara Valley              | 81d Sand Hills/Sand Dunes                                    |
| 13h Lahontan and Tonopah Playas                         | 5i Eastern Sierra Great Basin Slopes                 | 6w Monterey Bay Plains and Terraces      | 81e Upper Coachella Valley and Hills                         |
| 13u Tonopah Basin                                       | 5j Eastern Sierra Mojavean Slopes                    | 6x Leeward Hills/Western Diablo Range    | 81f Imperial/Lower Coachella Valleys                         |
| 13v Tonopah Sagebrush Foothills                         | 5k Southern Sierra Subalpine Forests                 | 6y Gabriel Range                         | 81g Lower Colorado/Gila River Valleys                        |
| 13x Sierra Nevada-Influenced Ranges                     | 5l Southern Sierra Upper Montane Forests             | 6z Diablo Range                          | 81h Sonoran Playas                                           |
| 13y Sierra Nevada-Influenced High Elevation Mountains   | 5m Southern Sierra Mid-Montane Forests               | 7a Rogue/Willits/Scott Valleys           | 81i Central Sonoran/Colorado Desert Mountains                |
| 14a Eastern Mojave Basins                               | 5n Southern Sierra Lower Montane Forest and Woodland | 7b Serpentine Siskiyou                   | 81j Central Sonoran/Colorado Desert Basins                   |
| 14b Eastern Mojave Low Ranges and Arid Foothills        | 5o Tehachapi Mountains                               | 7c Inland Siskiyou                       | 81k Arizona Upland/Eastern Sonoran Mountains                 |
| 14c Eastern Mojave Mountain Woodland and Shrubland      | 5p Tuscan Flows                                      | 7d Klamath River Ridges                  | 85a Santa Barbara Coastal Plain and Terraces                 |
| 14e Arid Valleys and Canyonlands                        | 5q Eastern Hills                                     | 7e Border High-Siskiyou                  | 85b Oxnard Plain and Valleys                                 |
| 14f Mojave Playas                                       | 5r Pleasant Valley/Kettleman Plain                   | 7f Western Klamath Low Elevation Forests | 85c Venturan-Angelino Coastal Hills                          |
| 14g Anargosa Desert                                     | 5s Gambler Range/EK Hills                            | 7g Western Klamath Montane Forests       | 85d Los Angeles Plain                                        |
| 14h Death Valley/Mojave Central Trough                  | 5t Grapevine Transition                              | 7h Eastern Klamath Low Elevation Forests | 85e Diegan Coastal Terraces                                  |
| 14i Mesquite Flat/Badwater Basin                        | 5u Tehachapi Foothills                               | 7i Eastern Klamath Montane Forests       | 85f Diegan Coastal Hills and Valleys                         |
| 14j Western Mojave Basins                               | 5v Salinas Valley                                    | 7j Marble/Salmon Mountains-Trinity Alps  | 85g Diegan Western Granitic Foothills                        |
| 14k Western Mojave Low Ranges and Arid Foothills        | 5w Northern Santa Lucia Range                        | 7k Scott Mountains                       | 85h Morena/Boundary Mountain Chaparral                       |
| 14l Western Mojave Mountain Woodland and Shrubland      | 5x Santa Lucia Coastal Forest and Woodland           | 7l Klamath Subalpine                     | 85i Northern Channel Islands                                 |
| 14m Western Mojave High Elevation Mountains             | 5y Interior Santa Lucia Range                        | 7m Ouzel Rock                            | 85j Southern Channel Islands                                 |
| 14n Mojave Lava Fields                                  | 5z Southern Santa Lucia Range                        | 7n Outer North Coast Ranges              | 85k Inland Valleys                                           |
| 14o Mojave Sand Dunes                                   | 6a Paso Robles Hills and Valleys                     | 7r High North Coast Ranges               | 85l Inland Hills                                             |
| 1a Coastal Lowlands                                     | 6b Salinas-Cholame Hills                             | 7a Northern Terraces                     | 85m Santa Ana Mountains                                      |
| 1i Northern Franciscan Redwood Forest                   | 6am Cuyama Valley                                    | 7b North Valley Alluvium                 | 8a Western Transverse Range Lower Montane Shrub and Woodland |
| 1j King Range/Mattole Basin                             | 6an Carrizo Plain                                    | 7c Butte Sink/Sutter and Colusa Basins   | 8b Western Transverse Range Montane Forest                   |
| 1k Coastal Franciscan Redwood Forest                    | 6ao Caliente Range                                   | 7d Southern Hardpan Terraces             | 8c Arid Montane Slopes                                       |
| 1l Fort Bragg/Fort Ross Terraces                        | 6ap Solomon-Purisima-Santa Ynez Hills                | 7e Sacramento/Feather Riverine Alluvium  | 8d Southern California Subalpine/Alpine                      |
| 1m Point Reyes/Farallon Islands                         | 6aq Santa Maria/Santa Ynez Valleys                   | 7f Sutter Buttes                         | 8e Southern California Lower Montane Shrub and Woodland      |
| 1n Santa Cruz Mountains                                 | 6ar Upper Sacramento River Alluvium                  | 7g Yolo Alluvial Fans                    | 8f Southern California Montane Conifer Forest                |
| 1o San Mateo Coastal Hills                              | 6b Northern Sierran Foothills                        | 7h Yolo/American Basin                   | 8g Northern Transverse Range                                 |
| 4d Cascade Subalpine/Alpine                             | 6c Southern Sierran Foothills                        | 7i Delta                                 | 8h Klamath/Goose Lake Basins                                 |
| 4e High Southern Cascades Montane Forest                | 6d Carmanche Terraces                                | 7k Lodi Alluvium                         | 8i Fremont Pine/Fir Forest                                   |
| 4f Low Southern Cascades Mixed Conifer Forest           | 6e Tehama Terraces                                   | 7l Stockton Basin                        | 8j Southern Cascades Slope                                   |
| 4g California Cascades Eastside Conifer Forest          | 6f Foothill Ridges and Valleys                       | 7m San Joaquin Basin                     | 8k Klamath Juniper Woodland/Devils Garden                    |
| 4h Southern Cascades Foothills                          | 6g North Coast Range Eastern Slopes                  | 7n Manteca/Merced Alluvium               | 8l Shasta Valley                                             |
| 5a Sierran Alpine                                       | 6h Western Valley Foothills/Dunnigan Hills           | 7o Westside Alluvial Fans and Terraces   | 8m Pit River Valleys                                         |
| 5b Northern Sierra Subalpine Forests                    | 6i Clear Lake Hills and Valleys                      | 7p Granitic Alluvial Fans and Terraces   | 8n Warner Mountains                                          |
| 5c Northern Sierra Upper Montane Forests                | 6j Mayacmas Mountains                                | 7q Panoche and Cantua Fans and Basins    | 8o High Elevation Warner Mountains                           |
|                                                         | 6k Napa-Sonoma-Lake Volcanic Highlands               | 7r Tulare Basin/Fresno Slough            | 8p Likely Tableland                                          |
|                                                         | 6l Napa-Sonoma-Russian River Valleys                 | 7s Kern Terraces                         | 8q Modoc/Lassen Juniper-Shrub Hills and Mountains            |
|                                                         | 6m Sonoma-Mendocino Mixed Forest                     | 7t South Valley Alluvium                 | 8r Adin/Horsehead Mountains Forest and Woodland              |
|                                                         | 6n Bodega Coastal Hills                              | 7u Antelope Plain                        | 8s Adin/Dixie Low Hills                                      |
|                                                         | 6o Marin Hills                                       | 7v Southern Clayey Basins                | 8t Modoc Lava Flows and Buttes                               |
|                                                         | 6p Bay Flats                                         | 80d Pluvial Lake Basins                  | 8u Old Cascades                                              |
|                                                         | 6q Suisun Terraces and Low Hills                     | 80g High Lava Plains                     |                                                              |

Figure S1. Legend to Figure 1 describing ecoregion codes.

## S2. MEGAN architecture and main differences between versions

The main differences of MEGAN v.2.1 to MEGAN v.2.04 are:

- 1) v2.04 does not have soil moisture or CO<sub>2</sub> response (but these were not used for MEGAN v.2.1 simulations in this study);
- 2) MEGAN v.2.04 uses a different emission factor database and has different light response algorithms (which are nearly the same for isoprene and mostly impact other compounds);
- 3) MEGAN v.2.04 uses different parameters in the canopy environment model.

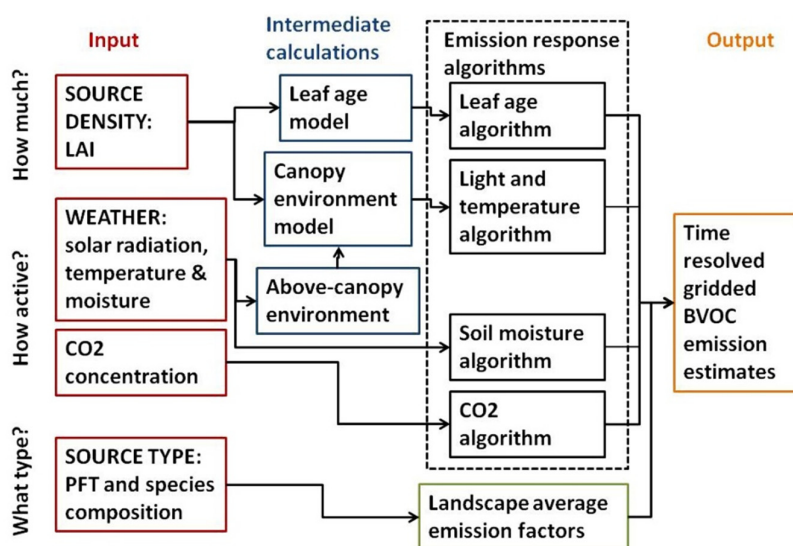

Figure S2. Schematic of MEGAN v.2.1 model components and driving variables (taken from Guenther et al., 2012).

### S3. Timeseries of simulated and observed emissions

In Figure S3, the time series of simulated and measured emissions are shown (plotted along the complete flight tracks).

Local similarities and discrepancies are observed in specific areas along the flight track and are discussed in the manuscript. Although there are different sources of uncertainty, the largest discrepancy occurs if the trees are significantly under or overrepresented, which could be due to fires, new growth, or incomplete landcover.

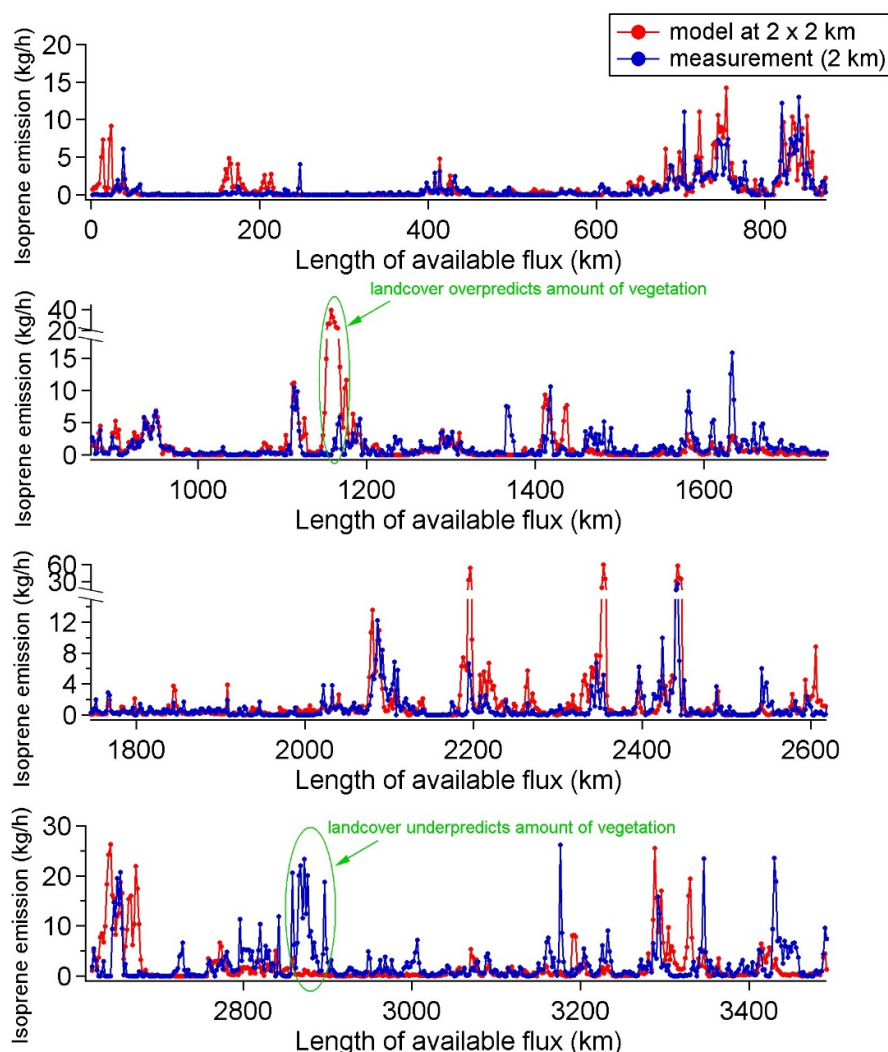

Figure S3. Time series for modeled and measured isoprene fluxes using the approximated circular footprint areas (only the data when flux was available are shown) along the full length of the flight tracks during the CABERNET campaign.

#### S4. The inverse G06 algorithm used in airborne emission factor derivation

In the original G06 algorithm (equation below),  $F_{G06}$  is the unknown, and BER is the known emission factor at standard temperature and PAR conditions. We inverse the equation so the BER is unknown and  $F$  is the airborne-derived surface flux. This BER is referred to as airborne basal emission factor (BEF) or just emission factor which represents the airborne flux inferred for the standard conditions of PAR=1000  $\mu\text{mol m}^{-2} \text{s}^{-1}$  and temperature = 30 °C.

$$F_{G06} = \underbrace{\text{BER} \cdot b_3 \cdot \exp[b_2 \cdot (P_{24} - P_0)] \cdot (P_{240})^{0.6} \cdot \frac{[b_1 - b_2 \ln(P_{240})] \cdot \text{PAR}}{\sqrt{1 + [b_1 - b_2 \ln(P_{240})]^2 \cdot \text{PAR}^2}}}_{\gamma_P} \cdot \underbrace{b_5 \cdot \exp[b_6 \cdot (T_{24} - 297)] \cdot \exp[b_6 \cdot (T_{240} - 297)] \cdot \frac{C_{T2} \cdot \exp\left[C_{T1} \cdot \left(\frac{1}{T_{\text{opt}}} - \frac{1}{T}\right) \cdot \frac{1}{0.00831}\right]}{C_{T2} - C_{T1} \cdot \left[1 - \exp\left(C_{T2} \cdot \left(\frac{1}{T_{\text{opt}}} - \frac{1}{T}\right) \cdot \frac{1}{0.00831}\right)\right]}}_{\gamma_T}$$

The micrometeorological variables include temperature close to the surface ( $T$ ) and PAR. Previous 24 and 240-hour history of temperature and PAR are accounted for in  $T_{24}$ ,  $P_{24}$ ,  $T_{240}$ ,  $P_{240}$  variables. The parameters of the algorithm were used as default (i.e.  $C_{T1}=95$ ,  $C_{T2}=230$ ,  $T_b=313$ ,  $P_0=200$ ,  $b_1=0.004$ ,  $b_2 = 0.0005$ ,  $b_3=0.0468$ ,  $b_4=0.6$ ,  $b_5=2.034$ ,  $b_6=0.05$ ).

#### Supplementary references:

Guenther, A. B., Jiang, X., Heald, C. L., Sakulyanontvittaya, T., Duhl, T., Emmons, L. K., and Wang, X.: The Model of Emissions of Gases and Aerosols from Nature version 2.1 (MEGAN2.1): an extended and updated framework for modeling biogenic emissions, *Geosci Model Dev*, 5, 1471-1492, 10.5194/gmd-5-1471-2012, 2012.
